# Supplementary material for: Optical modulation of excitation-contraction coupling in human-induced pluripotent stem cell-derived cardiomyocytes
Source: PubMed Central journal article supplement (PMC9984557; doi:10.1016/j.isci.2023.106121), 2023-02-02
Supplement: mmc1.pdf [file mmc1.pdf]

**Supplemental information**

**Optical modulation of excitation-contraction  
coupling in human-induced pluripotent  
stem cell-derived cardiomyocytes**

**Vito Vurro, Beatrice Federici, Carlotta Ronchi, Chiara Florindi, Valentina Sesti, Silvia Crasto, Claudia Maniezzi, Camilla Galli, Maria Rosa Antognazza, Chiara Bertarelli, Elisa Di Pasquale, Guglielmo Lanzani, and Francesco Lodola**

**A**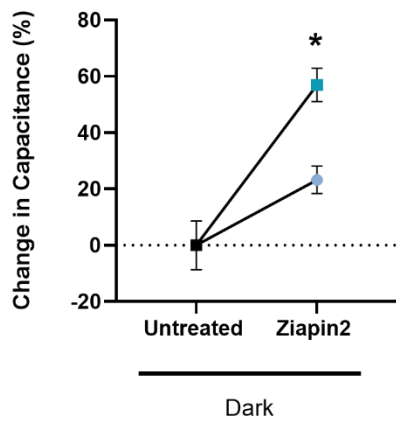**B**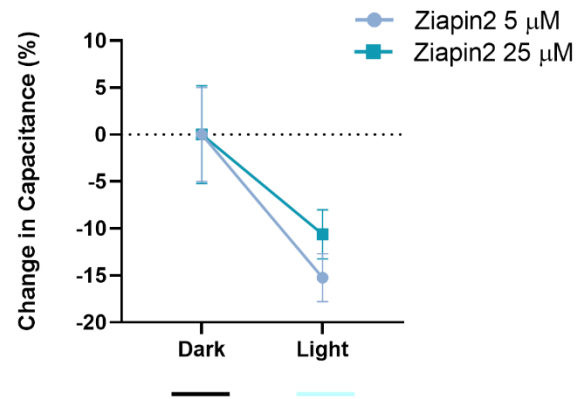

**Figure S1. Ziapin2-mediated modulation of membrane capacitance.** Evaluation of capacitance changes in hiPSC-CMs upon Ziapin2 membrane partitioning (**panel A**) and photoisomerization (**panel B**). Ziapin2 5 μM represented with light blue dots while 25 μM in teal squares. Light power density, 80 mW/mm<sup>2</sup>. The experiments were carried out at room temperature (24°C). n = 15 and 20 for untreated and Ziapin2-loaded cells respectively from three independent differentiations. Data are represented as mean ± SEM.

A

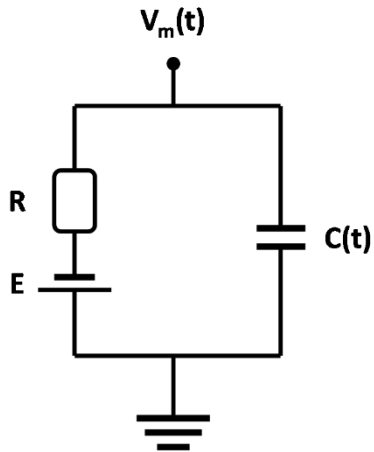

B

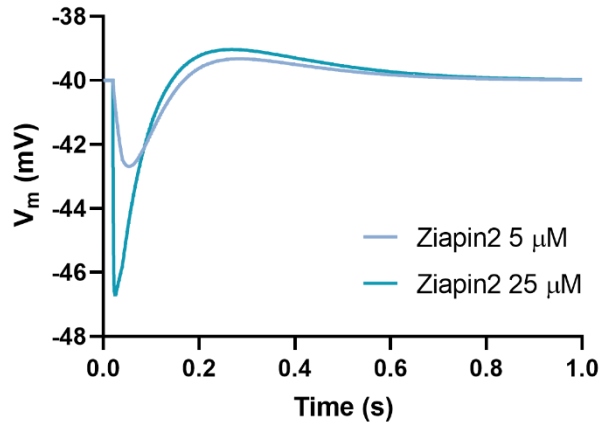

**Figure S2. Simulation of membrane voltage.** Simulated equivalent circuit (**panel A**) and capacitance-induced membrane potential variation (**panel B**). This simulation, performed as previously described,<sup>46</sup> mimics the effect of a 20 ms light pulse on Ziapin2 photoisomerization (a capacitance variation) and subsequent membrane potential modulation. To reproduce the observed effect, only the photoisomerization characteristic time has been reduced ( $t_{\text{hyp}} = 35$  ms for 5 mM and  $t_{\text{hyp}} = 1$  ms for 25 mM). This could be consistent with the localization of Ziapin2 in membrane domains more prone to favour isomerization.

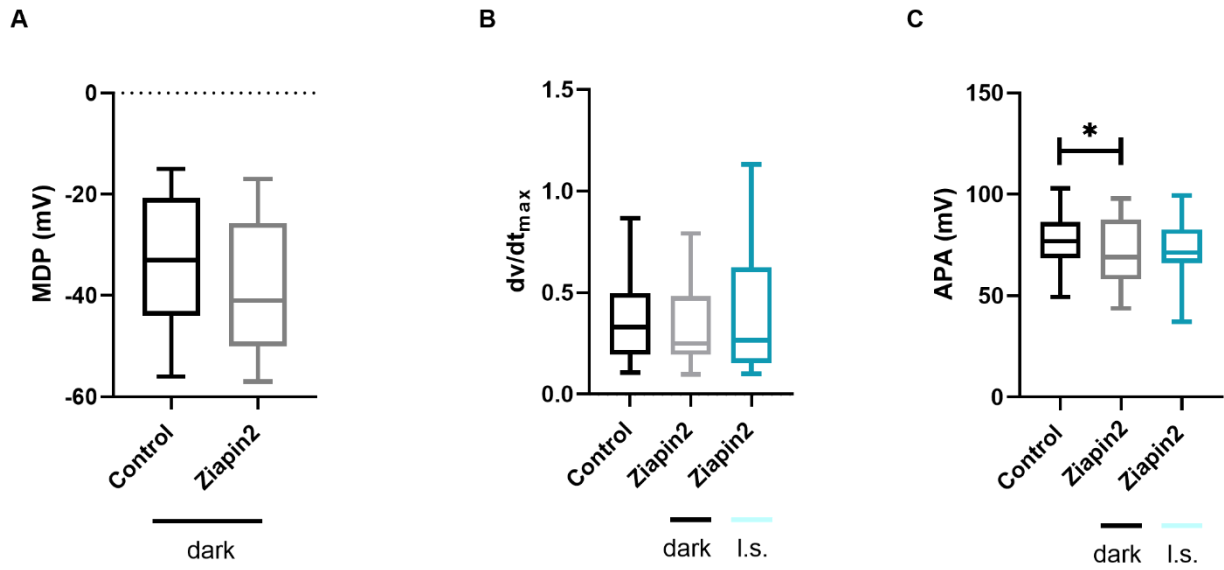

**Figure S3. AP parameters in hiPSC-CMs exposed to Ziapin2.** Comparison of the maximum diastolic potential (MDP, **panel A**), maximal rate of rise ( $dv/dt_{max}$ , **panel B**) and AP amplitude (APA, **panel C**) between spontaneous and light-evoked APs in 25 $\mu$ M Ziapin2 loaded hiPSC-CMs ( $n > 40$  for each condition from three independent differentiations). Data are presented as box and whiskers plot (min to max). Light power density, 80 mW/mm<sup>2</sup>. The experiments were carried out at room temperature (24°C). \*  $p < 0.05$ .

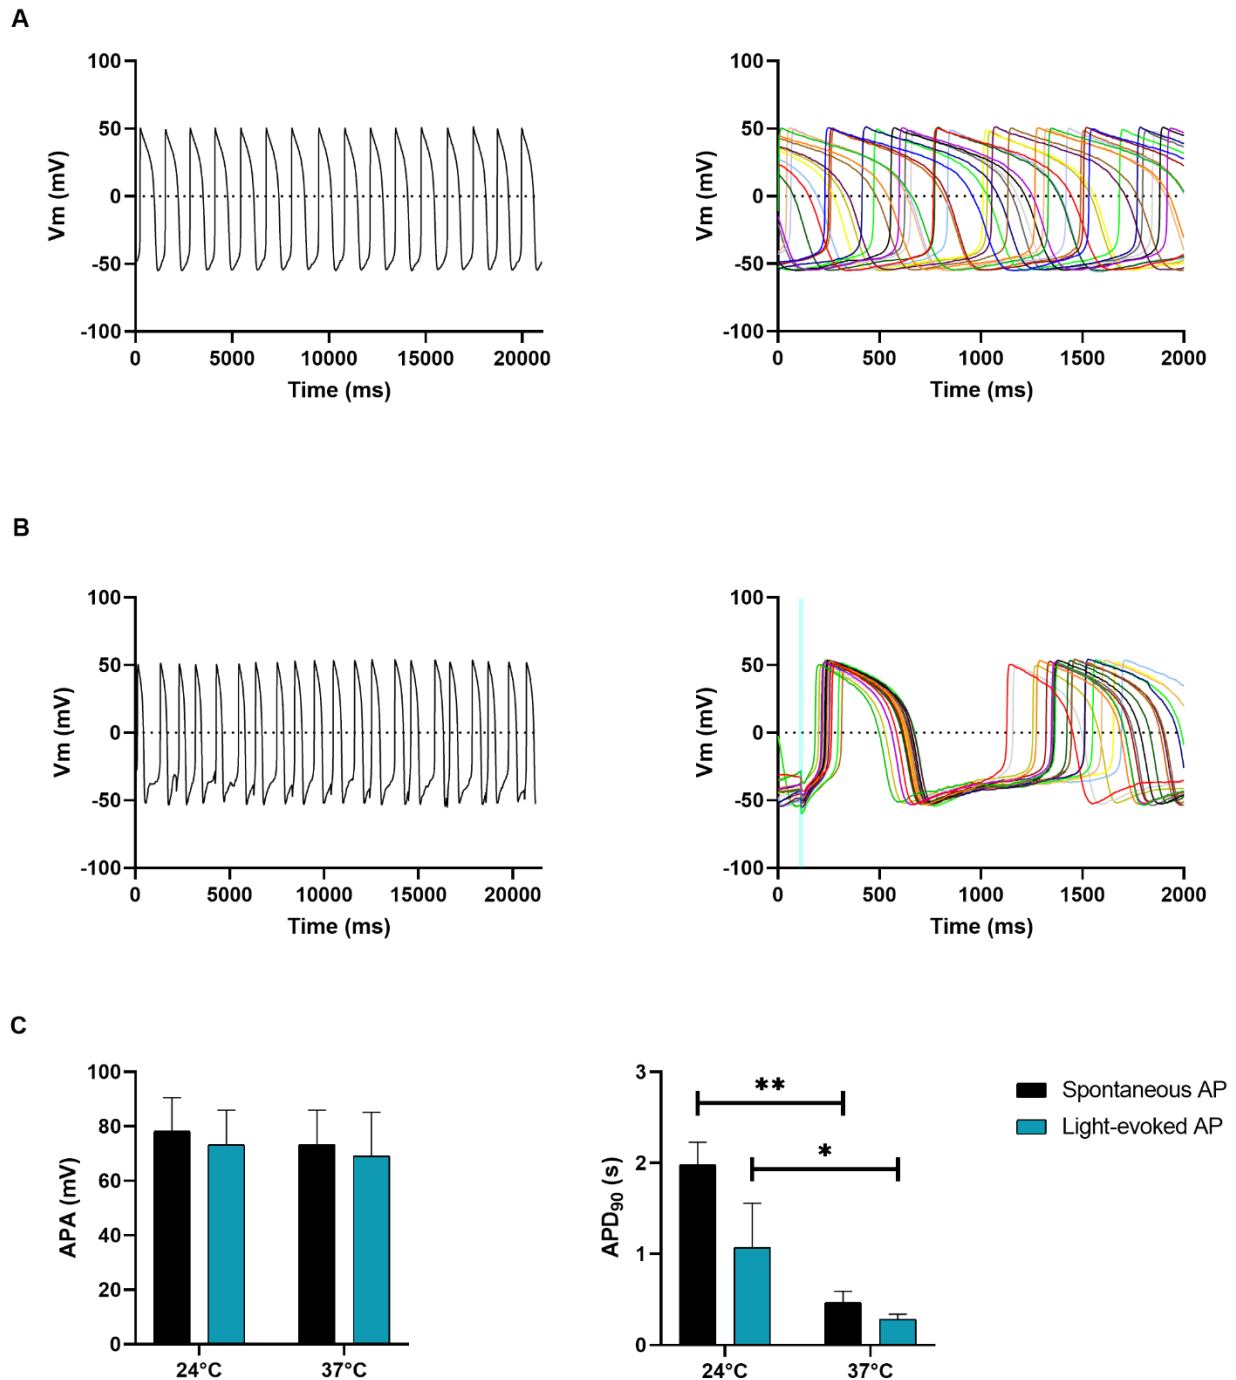

**Figure S4. Light-induced Vm modulation in Ziapin2 loaded hiPSC-CMs at 37°C.** **A)** Representative trace of spontaneous APs (left) and their distribution over a 2 second timescale (right). **B)** Representative trace of light-evoked APs (left) and their distribution over a 2 second timescale (right). The APs were generated in response to a light train stimulation (20 ms cycle length; 0.5 Hz stimulation frequency, represented as cyan shaded areas). Light power density, 80 mW/mm<sup>2</sup>. The experiments were carried out at 37°C. **C)** Comparison between spontaneous and light-evoked AP parameters (i.e., AP amplitude, APA and AP duration at 90% of repolarization, APD<sub>90</sub>) recorded either at room temperature or at 37°C (5<n<30, data are shown as mean ± SEM). \* p < 0.05, \*\* p < 0.01.

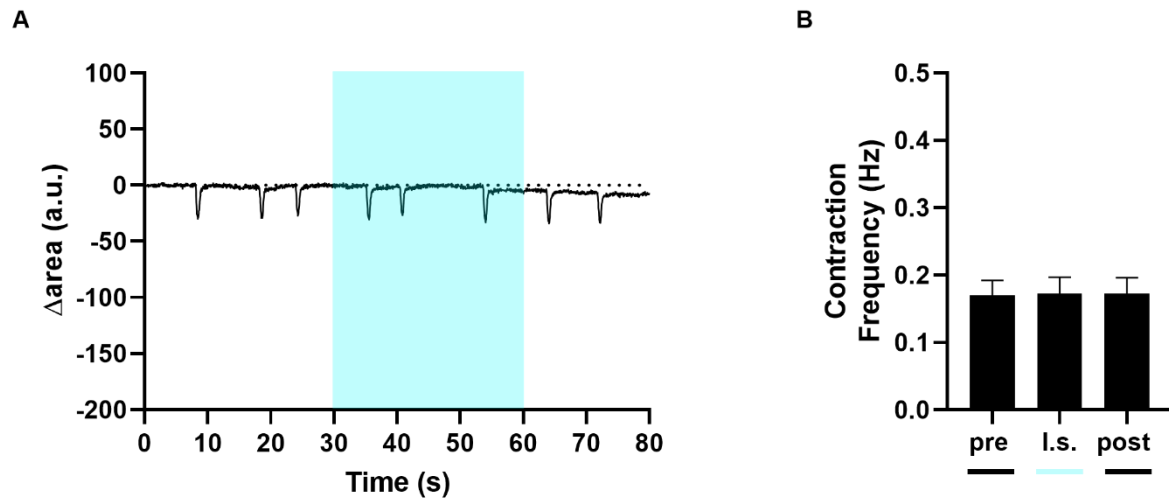

**Figure S5. Light-induced contraction rate modulation in hiPSC-CMs incubated with vehicle. A)** Representative trace of the contraction behaviour of DMSO-treated hiPSC-CMs. **B)** Contraction frequency before (pre), during (l.s.), and after (post) 1 Hz pulsed light stimulation at light power density = 30 mW/mm<sup>2</sup> (n = 25 from three independent differentiations, data are shown as mean  $\pm$  SEM). The experiments were carried out at room temperature (24°C).
